# Supplementary material for: Identify the immune characteristics and immunotherapy value of CD93 in the pan-cancer based on the public data sets
Source: Front Immunol. 2022 Oct 27;13:907182. doi: 10.3389/fimmu.2022.907182 (PMC9646793; doi:10.3389/fimmu.2022.907182)
Supplement: Supplementary file 7 [file Table_6.xlsx]

## Sheet: SheetName
Compound	RNAtype	RNAmolecule	Omics	Source	Pearson.stat	Pearson.fdr	Spearman.stat	Spearman.fdr	Compound	RNAtype	RNAmolecule	Omics	Source	Pearson.stat	Pearson.fdr	Spearman.stat	Spearman.fdr
PF2341066	mRNA	CD93	Expression	CCLE	-0.23361	0.000757531	-0.188923	0.00612577	triostin a	mRNA	CD93	Expression	CellMiner	-0.540991	0.000879715	-	-
PD-0332991	mRNA	CD93	Expression	CCLE	-0.214507	0.00192269	-0.170408	0.012274	sb-253226	mRNA	CD93	Expression	CellMiner	-0.506553	0.032009	-	-
L-685458	mRNA	CD93	Expression	CCLE	-0.157753	0.0250551	-	-	toxin .delta.53l	mRNA	CD93	Expression	CellMiner	-0.444727	0.00963698	-0.369706	0.041155
TKI258	mRNA	CD93	CNV	CCLE	0.176491	0.0321515	0.189798	0.0112368	pederin	mRNA	CD93	Expression	CellMiner	-0.441375	0.0395112	-	-
PF2341066	mRNA	CD93	Methylation	CCLE	0.192086	0.0431881	-	-	euserotin	mRNA	CD93	Expression	CellMiner	-0.440408	0.0143298	-	-
L-685458	mRNA	CD93	Methylation	CCLE	0.20092	0.0216014	0.220017	0.0130695	kahalide f	mRNA	CD93	Expression	CellMiner	-0.438758	0.021696	-	-
Panobinostat	mRNA	CD93	Methylation	CCLE	0.210781	0.0105805	-	-	;NCGC00350716-01	mRNA	CD93	Expression	CellMiner	-0.415138	0.0288787	-	-
Irinotecan	mRNA	CD93	Expression	CCLE	-	-	-0.146572	0.0345363	gw772405x	mRNA	CD93	Expression	CellMiner	-0.377364	0.0264021	-	-
L-685458	mRNA	CD93	CNV	CCLE	-	-	0.176856	0.037112	;1-(6-chloro-1H-benzo[d]imidazol-2-yl)-3-(4-methoxypheny...	mRNA	CD93	Expression	CellMiner	-0.373177	0.0269946	-	-
Nutlin-3	mRNA	CD93	Mutation	CCLE	-	-	-	-	;(E)-5-chloro-3-((6-(4-chlorophenyl)-2-cyclopropylimidaz...	mRNA	CD93	Expression	CellMiner	-0.350005	0.0301115	-0.401067	0.0155177
Panobinostat	mRNA	CD93	CNV	CCLE	-	-	0.212753	0.00303281	phenazine di-n-oxide	mRNA	CD93	Expression	CellMiner	0.347265	0.0470345	-	-
TKI258	mRNA	CD93	Expression	CCLE	-	-	-0.1571	0.0250149	rustaiyan a	mRNA	CD93	Expression	CellMiner	0.350591	0.0469692	-	-
Topotecan	mRNA	CD93	Expression	CCLE	-	-	-0.155663	0.023003	stereoisomer of 672120 (mw=262)	mRNA	CD93	Expression	CellMiner	0.354019	0.0485794	-	-
									mercury, (p-dioxane-2,5-diyldimethylene)bis[(octanoyloxy)-	mRNA	CD93	Expression	CellMiner	0.355451	0.0434309	-	-
									melampodinin	mRNA	CD93	Expression	CellMiner	0.356109	0.0440967	-	-
									naphthazarin	mRNA	CD93	Expression	CellMiner	0.359685	0.0484172	-	-
									nanaomycin	mRNA	CD93	Expression	CellMiner	0.359796	0.0455569	-	-
									thioperoxydicarbonic diamide, tetramethyl-	mRNA	CD93	Expression	CellMiner	0.360603	0.0276966	0.39034	0.0200767
									1,3-butadiene, 1,1,2,4,4-pentachloro-3-nitro-	mRNA	CD93	Expression	CellMiner	0.362563	0.0475864	0.375446	0.0466062
									neplanocin a	mRNA	CD93	Expression	CellMiner	0.365435	0.0407524	-	-
									predorine	mRNA	CD93	Expression	CellMiner	0.365552	0.0394792	-	-
									euchrysine	mRNA	CD93	Expression	CellMiner	0.365561	0.0459804	-	-
									2-chloro-3-(n-(l)-tyrosinamido)naphthazarin	mRNA	CD93	Expression	CellMiner	0.365898	0.0342387	0.360572	0.0343743
									arteether	mRNA	CD93	Expression	CellMiner	0.366131	0.049449	-	-
									trimethyl tmm	mRNA	CD93	Expression	CellMiner	0.366751	0.0400081	-	-
									spiro(3-cyclopentene-1,1'-indane)-2,5-dione, 3-bromo-	mRNA	CD93	Expression	CellMiner	0.367614	0.0376335	-	-
									[bis(aminomethyl)diethylsilane]dichloroplatinum (ii)	mRNA	CD93	Expression	CellMiner	0.368112	0.0372622	-	-
									artemether	mRNA	CD93	Expression	CellMiner	0.368208	0.0393764	-	-
									rifocin	mRNA	CD93	Expression	CellMiner	0.368526	0.028218	0.356203	0.0418992
									acridine, 9-[5-(ethylthio)-1,3,4-thiadiazol-2-yl]-	mRNA	CD93	Expression	CellMiner	0.369086	0.0389463	-	-
									euparotin acetate	mRNA	CD93	Expression	CellMiner	0.369095	0.0423227	-	-
									tetracarboxyphthalocyanine-gadolinium	mRNA	CD93	Expression	CellMiner	0.369794	0.0418661	-	-
									sodium[(tetratropolonato)bismuthate(iii)]	mRNA	CD93	Expression	CellMiner	0.371757	0.0432719	-	-
									naphthalen-1,4-dione, 3-butanoylamino-2-chloro-1,4-dihydro-	mRNA	CD93	Expression	CellMiner	0.37382	0.0480267	-	-
									11h-benzo[a]carbazole-1,4-dione, 7,11-dimethyl-	mRNA	CD93	Expression	CellMiner	0.375857	0.0338036	-	-
									epicorazine a	mRNA	CD93	Expression	CellMiner	0.376881	0.0423157	-	-
									streptonigrin analog (meo-n3)	mRNA	CD93	Expression	CellMiner	0.377068	0.0377343	0.440106	0.0332983
									1,4-benzenediol, 2,5-bis(1-pyrazolyl)-	mRNA	CD93	Expression	CellMiner	0.379273	0.027183	-	-
									2-[(phenylamino)methyl]benzene-1,4-diol	mRNA	CD93	Expression	CellMiner	0.380026	0.0375595	-	-
									5-nitrofurylmalonic acid diethyl ester	mRNA	CD93	Expression	CellMiner	0.380134	0.0495707	-	-
									3-chloromethyl-6-hydroxyamino-1-(methanesulfonyl)indoline	mRNA	CD93	Expression	CellMiner	0.381129	0.0388303	-	-
									3-methoxy-2-phenoxy-2-phenylimidazo[1,2-b]pyridazine	mRNA	CD93	Expression	CellMiner	0.381686	0.02578	-	-
									bulleyanin	mRNA	CD93	Expression	CellMiner	0.382056	0.0392037	-	-
									shikonin	mRNA	CD93	Expression	CellMiner	0.382218	0.0280108	-	-
									ag 957	mRNA	CD93	Expression	CellMiner	0.382881	0.0314079	-	-
									incarnal	mRNA	CD93	Expression	CellMiner	0.383557	0.0403256	-	-
									chalcone analog	mRNA	CD93	Expression	CellMiner	0.38405	0.0276969	-	-
									2-chloro-3-(n-(l-isoleucino))naphthazarin methyl ester	mRNA	CD93	Expression	CellMiner	0.384131	0.0470998	-	-
									mecal	mRNA	CD93	Expression	CellMiner	0.384526	0.0292014	0.417052	0.0245084
									2,5-pyrrolidinedione, 1-(3-ethynylphenyl)-	mRNA	CD93	Expression	CellMiner	0.385756	0.0285495	-	-
									methyl 4-[2-[4-bromo-2,5-dihydroxyphenyl]ethyl]benzoate	mRNA	CD93	Expression	CellMiner	0.386611	0.0213963	-	-
									[co(me2dtc)2(dee)]clo4	mRNA	CD93	Expression	CellMiner	0.388087	0.0284827	-	-
									roseophilin, hcl salt	mRNA	CD93	Expression	CellMiner	0.388412	0.0249416	-	-
									cyclo(-(r)-b2hphe-d-pro-lys-phe)	mRNA	CD93	Expression	CellMiner	0.388647	0.039585	-	-
									kinamycin c	mRNA	CD93	Expression	CellMiner	0.390638	0.0499663	-	-
									2-chloro-3-(2-butoxyethoxy)naphthazarin	mRNA	CD93	Expression	CellMiner	0.391135	0.0227384	-	-
									nsc 220334	mRNA	CD93	Expression	CellMiner	0.392134	0.0351752	-	-
									1,2-naphthoquinone, 3,7-dimethyl-	mRNA	CD93	Expression	CellMiner	0.392234	0.036001	-	-
									3-bromo-4-(1-hexynyl)-2(5h)-furanone	mRNA	CD93	Expression	CellMiner	0.393238	0.0337357	-	-
									Chelerythrine	mRNA	CD93	Expression	CellMiner	0.393725	0.0252969	-	-
									sergeolide,desacetyl	mRNA	CD93	Expression	CellMiner	0.394331	0.0415019	-	-
									6-benzylthioinosine	mRNA	CD93	Expression	CellMiner	0.395029	0.0267503	-	-
									diisopropoxybis(chinoline-8-olato)titanium(iv)	mRNA	CD93	Expression	CellMiner	0.395233	0.0176511	-	-
									heliangolide	mRNA	CD93	Expression	CellMiner	0.395619	0.0360382	-	-
									4-chloro-5-(pyridin-2-ylthio)-3h-1,2-dithiole-3-thione	mRNA	CD93	Expression	CellMiner	0.395679	0.0308501	-	-
									versimide	mRNA	CD93	Expression	CellMiner	0.396164	0.0444977	-	-
									2,2',5,5'-tetrahydroxy-4,4'-dimethylbiphenyl	mRNA	CD93	Expression	CellMiner	0.396304	0.0483301	-	-
									(z)-3-bromo-3-iodo-2-phenylpropenal	mRNA	CD93	Expression	CellMiner	0.396339	0.0210558	-	-
									Asaley	mRNA	CD93	Expression	CellMiner	0.396726	0.0392941	-	-
									2-bromo-5-methoxybenzal-2',3'-dimethoxy-5-naphthylamine	mRNA	CD93	Expression	CellMiner	0.396879	0.0412172	-	-
									3,8-dimethyl-1,2-naphthoquinone	mRNA	CD93	Expression	CellMiner	0.39765	0.0198155	-	-
									4-morpholinecarbodithioic acid, antimony complex	mRNA	CD93	Expression	CellMiner	0.398377	0.0178854	0.450998	0.00693267
									chlorobisoximatobismuth(iii)-dihydrochloride	mRNA	CD93	Expression	CellMiner	0.398418	0.0176777	0.350421	0.0459236
									b720389k237	mRNA	CD93	Expression	CellMiner	0.398791	0.0376834	-	-
									2-bromo-8-hydroxy-6-methyl-1,4-naphthoquinone	mRNA	CD93	Expression	CellMiner	0.39892	0.0161598	-	-
									s-decyl p-toluenethiosulfonate	mRNA	CD93	Expression	CellMiner	0.399164	0.0350975	-	-
									(3r,6'rs)-3-hydroxy-.beta.,.epsilon.-caroten-3-one	mRNA	CD93	Expression	CellMiner	0.399496	0.0317336	-	-
									Fenretinide	mRNA	CD93	Expression	CellMiner	0.399812	0.0281337	-	-
									cycloshikonin	mRNA	CD93	Expression	CellMiner	0.400253	0.034494	-	-
									1-methyl-3-octadecylimidazolium chloride	mRNA	CD93	Expression	CellMiner	0.400856	0.023979	-	-
									sungucin	mRNA	CD93	Expression	CellMiner	0.400956	0.0238754	-	-
									benz[a]anthracene-1,4-dione, 1,4-dihydro-7,12-dimethyl-	mRNA	CD93	Expression	CellMiner	0.401	0.0179417	-	-
									vicenistatin	mRNA	CD93	Expression	CellMiner	0.401069	0.0230979	-	-
									1-decarboxy-3-oxo-ceanothic acid	mRNA	CD93	Expression	CellMiner	0.401443	0.0230095	-	-
									disulfoxide, bis(3-chloropropyl)	mRNA	CD93	Expression	CellMiner	0.401451	0.0186922	-	-
									brucine, dihydro-	mRNA	CD93	Expression	CellMiner	0.402216	0.0454329	-	-
									bis(salicylidene-2-methyl-1-propanole-2-imine)cobalt(ii)	mRNA	CD93	Expression	CellMiner	0.402343	0.0233317	-	-
									tricyclo[4.4.0.0(2,7)]decane-5-one, 4,4-dibromo-2-methyl-	mRNA	CD93	Expression	CellMiner	0.403023	0.0320983	-	-
									4-(p-methylphenyl)aminopyrazolo[3,4-d]pyrimidin-6-thion	mRNA	CD93	Expression	CellMiner	0.40431	0.0451077	-	-
									encelin	mRNA	CD93	Expression	CellMiner	0.404481	0.0297886	-	-
									2-methoxycarbonyl-3,4-dichloro-5-nitrofuran	mRNA	CD93	Expression	CellMiner	0.404845	0.0374097	-	-
									2,5-norbornadiene-2-carboxylic acid, 3-formyl-, methylester	mRNA	CD93	Expression	CellMiner	0.4052	0.0232828	-	-
									4,7-[bis-n,n'-(3-amino-9-thioacetamido)-acridine]-biphenyl	mRNA	CD93	Expression	CellMiner	0.405201	0.013966	0.383384	0.0465838
									loganin, 6-beta-hydroxy	mRNA	CD93	Expression	CellMiner	0.405564	0.0443195	-	-
									2-bromo-5,8-dihydroxy-3-methyl-1,4-naphthoquinone	mRNA	CD93	Expression	CellMiner	0.405647	0.0129128	-	-
									haginin a	mRNA	CD93	Expression	CellMiner	0.406828	0.0424031	-	-
									(2,2-dimethyl)-1,3-propandiyl-bis(2,3-dichloro)maleimide	mRNA	CD93	Expression	CellMiner	0.407712	0.0117396	-	-
									7,12-epidioxybenz[a]anthracene, 7,12-dihydro-7-methyl-	mRNA	CD93	Expression	CellMiner	0.408172	0.02833	0.415359	0.0320315
									psorspermin	mRNA	CD93	Expression	CellMiner	0.408843	0.0290449	-	-
									digitonin	mRNA	CD93	Expression	CellMiner	0.409055	0.0193997	-	-
									1,2-cyclohexanediamine, platinum complex (9ci)	mRNA	CD93	Expression	CellMiner	0.409628	0.0161448	-	-
									streptorubrin	mRNA	CD93	Expression	CellMiner	0.410669	0.0299881	-	-
									15-oxozoapatlin	mRNA	CD93	Expression	CellMiner	0.410806	0.0390449	-	-
									C.I. 51045	mRNA	CD93	Expression	CellMiner	0.410857	0.0478033	-	-
									2-propen-1-one, 3-(1-naphthalenyl)-1-phenyl- (9ci)	mRNA	CD93	Expression	CellMiner	0.41114	0.0144163	0.435325	0.0176624
									6-bromotoyocamycin	mRNA	CD93	Expression	CellMiner	0.412329	0.026286	0.429205	0.0221456
									1h-benzo[a]carbazole-1,4(11h)-dione, 11-(2-nitrophenyl)-	mRNA	CD93	Expression	CellMiner	0.412372	0.020446	0.490899	0.0139658
									thalicarpin	mRNA	CD93	Expression	CellMiner	0.412717	0.0312434	-	-
									6-n-(4-morpholino)-7-chloro-5,8-quinolinedione	mRNA	CD93	Expression	CellMiner	0.41295	0.0163683	-	-
									2-(2-methyl-2-nitropropoxy)bornane	mRNA	CD93	Expression	CellMiner	0.413036	0.0428233	-	-
									[3-(4-chloro-phenyl)-3-oxo-propenylamino]-acetonitrile	mRNA	CD93	Expression	CellMiner	0.41311	0.0318947	-	-
									CHIP	mRNA	CD93	Expression	CellMiner	0.413544	0.0304812	-	-
									2-methoxy-5h-pyrido[3,2:4,5]pyrrolo[3,2-c]cinnoline	mRNA	CD93	Expression	CellMiner	0.415099	0.032371	-	-
									bradykinin antagonist	mRNA	CD93	Expression	CellMiner	0.415837	0.0426109	-	-
									diketocoriolin b	mRNA	CD93	Expression	CellMiner	0.415875	0.0130365	-	-
									2-propen-1-one, 3-(2-hydroxyphenyl)-1-phenyl- (9ci)	mRNA	CD93	Expression	CellMiner	0.416222	0.0467247	-	-
									benzoic acid, p-[(purin-6-ylthio)mercuri]-	mRNA	CD93	Expression	CellMiner	0.416467	0.0395156	-	-
									daunorubicineal	mRNA	CD93	Expression	CellMiner	0.416822	0.0320604	-	-
									phenylmercuric acetate (usan)	mRNA	CD93	Expression	CellMiner	0.417548	0.0414993	0.433327	0.0390322
									2,4-cyclopentadien-1-one, 2-bromo-3,4,5-triphenyl- (9ci)	mRNA	CD93	Expression	CellMiner	0.417643	0.0171143	-	-
									ajoene, trans-	mRNA	CD93	Expression	CellMiner	0.417981	0.0101235	0.384254	0.0433112
									4-piperidinone, 3,5-bis[(4-nitrophenyl)methylene]-, (e,e)-	mRNA	CD93	Expression	CellMiner	0.419822	0.0191314	-	-
									sanguilutine pseudobase	mRNA	CD93	Expression	CellMiner	0.420133	0.0187479	-	-
									sulfide, 2,4-dinitrophenyl 2-nitro-p-tolyl	mRNA	CD93	Expression	CellMiner	0.420321	0.0271255	-	-
									mp 317	mRNA	CD93	Expression	CellMiner	0.420581	0.0211575	-	-
									;5,6,7,8-tetrafluoronaphtho[2,3-c][1,2,5]thiadiazole-4,9...	mRNA	CD93	Expression	CellMiner	0.420592	0.0377071	-	-
									diosquinone	mRNA	CD93	Expression	CellMiner	0.420935	0.0134006	-	-
									1-penten-3-one, 5-(4-morpholinyl)-1-phenyl-, hydrochloride	mRNA	CD93	Expression	CellMiner	0.421758	0.0100112	-	-
									6-aminotoyocamycin	mRNA	CD93	Expression	CellMiner	0.421846	0.0459524	-	-
									berbamine	mRNA	CD93	Expression	CellMiner	0.422291	0.0129198	-	-
									destruxin b	mRNA	CD93	Expression	CellMiner	0.422356	0.0482351	-	-
									perezone	mRNA	CD93	Expression	CellMiner	0.422738	0.0148897	-	-
									Hydroxyurea	mRNA	CD93	Expression	CellMiner	0.42298	0.026778	-	-
									;(E)-1-(4-methoxyphenyl)-3-(2-(3,4,5-trimethoxyphenylami...	mRNA	CD93	Expression	CellMiner	0.423365	0.0404001	-	-
									mexicanin e	mRNA	CD93	Expression	CellMiner	0.424764	0.0255618	-	-
									(+)-neocryptotanshinone	mRNA	CD93	Expression	CellMiner	0.424867	0.0266096	-	-
									1h-benzo[a]carbazole-1,4(11h)-dione, 8-methoxy-11- methyl-	mRNA	CD93	Expression	CellMiner	0.425382	0.00849786	-	-
									4-piperidinone, 1-methyl-2,6-bis[(2-nitrophenyl)methylene]-	mRNA	CD93	Expression	CellMiner	0.42544	0.0320423	-	-
									antineoplastic-690268	mRNA	CD93	Expression	CellMiner	0.425874	0.0235649	-	-
									wln: t56 bnonj bo fnw i- at6n dntj d1	mRNA	CD93	Expression	CellMiner	0.425885	0.0458056	-	-
									excisanin b	mRNA	CD93	Expression	CellMiner	0.425946	0.0335251	-	-
									2-[3-chloro-3-(4-chloro-phenyl)-allylidene]-malononitrile	mRNA	CD93	Expression	CellMiner	0.426188	0.0224521	-	-
									Dichloroallyl lawsone	mRNA	CD93	Expression	CellMiner	0.426886	0.0233766	-	-
									propiophenone, 3-phenyl-3-piperidino-	mRNA	CD93	Expression	CellMiner	0.427459	0.00922493	-	-
									oxanosine	mRNA	CD93	Expression	CellMiner	0.427628	0.0164979	-	-
									2-chloro-1,7-dimethyl-phenothiazone	mRNA	CD93	Expression	CellMiner	0.428216	0.0140497	-	-
									10.beta.-hydroxy-17.beta.-acetoxyestra-1,4-dien-3-one	mRNA	CD93	Expression	CellMiner	0.42884	0.0253798	-	-
									1,4-naphthoquinone, 2,2'-(1,4-piperazinediyl)bis[3-chloro-	mRNA	CD93	Expression	CellMiner	0.428885	0.0102391	-	-
									4-Piperidinone, 3,5-bis[(2-fluorophenyl)methylene]-, ace...	mRNA	CD93	Expression	CellMiner	0.429462	0.0490977	-	-
									zaluzanin c	mRNA	CD93	Expression	CellMiner	0.429885	0.025708	-	-
									Estramustine	mRNA	CD93	Expression	CellMiner	0.430599	0.0478162	-	-
									pyrimidine, 2,4,6-trichloro-5-propyl-	mRNA	CD93	Expression	CellMiner	0.430797	0.0434889	-	-
									suavedol	mRNA	CD93	Expression	CellMiner	0.431047	0.0357711	-	-
									ver a	mRNA	CD93	Expression	CellMiner	0.431316	0.0272903	-	-
									santalin	mRNA	CD93	Expression	CellMiner	0.431418	0.0121191	-	-
									trichlorotris(4-vinylpyridine)ruthenium(iii)	mRNA	CD93	Expression	CellMiner	0.431422	0.0438094	-	-
									propanedinitrile, 2-(phenylmethyl)thio-	mRNA	CD93	Expression	CellMiner	0.431627	0.00869538	-	-
									acnistin f	mRNA	CD93	Expression	CellMiner	0.431757	0.0205101	-	-
									eupachlorin acetate	mRNA	CD93	Expression	CellMiner	0.432121	0.0117349	-	-
									crassin acetate	mRNA	CD93	Expression	CellMiner	0.432316	0.0181856	-	-
									dalbergione	mRNA	CD93	Expression	CellMiner	0.432538	0.00872324	-	-
									naphtho[2,3-b]thiophene-4,9-dione, 2,7-diacetyl-	mRNA	CD93	Expression	CellMiner	0.432785	0.0211022	-	-
									9-acetamido-10-hydroxy-20-(s)-camptothecin	mRNA	CD93	Expression	CellMiner	0.433131	0.0375428	-	-
									2-[(3,4-dicloro)anilino]-3-phenyl-5,7-diamino quinoxaline	mRNA	CD93	Expression	CellMiner	0.433482	0.0226732	-	-
									tetra(n-methyl-2-pyridyl)-porphyrin chloride	mRNA	CD93	Expression	CellMiner	0.433558	0.0142985	-	-
									ethyl 3-[4-(5-nitro-2-furylacryloyl)aminophenyl]propionate	mRNA	CD93	Expression	CellMiner	0.433658	0.0136924	-	-
									aquamycin	mRNA	CD93	Expression	CellMiner	0.434261	0.0158895	-	-
									bis(3-chloropropyl)disulfide	mRNA	CD93	Expression	CellMiner	0.434716	0.00836106	-	-
									landomycin a	mRNA	CD93	Expression	CellMiner	0.434963	0.0207622	0.449417	0.0313836
									4-demethylcalycopterone	mRNA	CD93	Expression	CellMiner	0.435156	0.0106044	-	-
									pyrazoline derivative	mRNA	CD93	Expression	CellMiner	0.435369	0.0368022	0.439514	0.0396867
									lmu-3 herz	mRNA	CD93	Expression	CellMiner	0.435466	0.00903571	-	-
									6-methyl-2-[(2,4-dinitrophenyl)thio]-4-(1h)-pyrimidinone	mRNA	CD93	Expression	CellMiner	0.436597	0.0200037	-	-
									1h-benzo[a]carbazole-1,4(11h)-dione, 11-methyl-	mRNA	CD93	Expression	CellMiner	0.436728	0.0101657	-	-
									p,p'-dihydroxystilbene	mRNA	CD93	Expression	CellMiner	0.437483	0.0442898	-	-
									isopinnatal	mRNA	CD93	Expression	CellMiner	0.438501	0.0194888	-	-
									perchloropyrimidine	mRNA	CD93	Expression	CellMiner	0.439246	0.0114136	-	-
									crassin	mRNA	CD93	Expression	CellMiner	0.439388	0.0131793	-	-
									4-chloro-5-phenoxy-3h-1,2-dithiole-3-thione	mRNA	CD93	Expression	CellMiner	0.439614	0.00985145	-	-
									1-adamantanamine, n-[(2-bromophenyl)methylene]-	mRNA	CD93	Expression	CellMiner	0.44103	0.0104382	-	-
									Uracil mustard	mRNA	CD93	Expression	CellMiner	0.441611	0.0304938	-	-
									quinazoline, 4-ethyl-6-methoxy-7-(oxiranylmethoxy)-	mRNA	CD93	Expression	CellMiner	0.441628	0.0138447	-	-
									nsc 234214	mRNA	CD93	Expression	CellMiner	0.442151	0.00668702	0.391738	0.0426767
									;(Z)-5-Methoxy-2-(1-methyl-5-nitroimidazole-2-ylmethylen...	mRNA	CD93	Expression	CellMiner	0.442177	0.0267509	-	-
									3-bromo-4-phenylethynyl-2(5h)-furanone	mRNA	CD93	Expression	CellMiner	0.443053	0.0224996	-	-
									2-(nitromethyl)-2-cyclohepten-1-one	mRNA	CD93	Expression	CellMiner	0.44312	0.0278241	-	-
									caracemide	mRNA	CD93	Expression	CellMiner	0.443209	0.0063442	0.386078	0.0343929
									oxin	mRNA	CD93	Expression	CellMiner	0.443619	0.00842445	-	-
									p-phenylenediamine, n,n-bis(2-chloroethyl)-, hydrochloride	mRNA	CD93	Expression	CellMiner	0.443781	0.043083	-	-
									;(Z)-5-Methyl-2-(1-methyl-4-nitroimidazole-5-ylmethylene...	mRNA	CD93	Expression	CellMiner	0.443912	0.0463532	-	-
									1,4-anthracenedione, 5-hydroxy-	mRNA	CD93	Expression	CellMiner	0.44403	0.0112088	-	-
									3,3?-thiene-2,5-diylbis(5-methoxy-1h-indole)	mRNA	CD93	Expression	CellMiner	0.444718	0.00833813	-	-
									mercuryl	mRNA	CD93	Expression	CellMiner	0.445244	0.039854	-	-
									7-methyljuglone	mRNA	CD93	Expression	CellMiner	0.445285	0.0102168	-	-
									1,1-dimethylethyl methyl diester, (z, e)	mRNA	CD93	Expression	CellMiner	0.446057	0.00901493	-	-
									carboxymethyl ethylxanthate	mRNA	CD93	Expression	CellMiner	0.446496	0.0104319	-	-
									doxoform	mRNA	CD93	Expression	CellMiner	0.446517	0.0227163	-	-
									actinomycin x4357g methoxime	mRNA	CD93	Expression	CellMiner	0.446703	0.0271647	-	-
									pyrimidine, 2,4,5-trichloro-6-isopropyl-	mRNA	CD93	Expression	CellMiner	0.446748	0.0188652	-	-
									nsc 284682	mRNA	CD93	Expression	CellMiner	0.446915	0.016887	-	-
									1-penten-4-yn-3-one, 5-(2,4-dimethoxypyrimidin-5-yl)-	mRNA	CD93	Expression	CellMiner	0.447156	0.00669522	-	-
									benzimidazole, 5,6-dichloro-1-.beta.-d-ribofuranosyl- (8ci)	mRNA	CD93	Expression	CellMiner	0.447684	0.0337293	-	-
									4h-cyclopenta[c]thiophen-4-one, 1,3-dichloro-	mRNA	CD93	Expression	CellMiner	0.447778	0.0112545	-	-
									bare prodigiosine	mRNA	CD93	Expression	CellMiner	0.448035	0.0301135	-	-
									1h-benzo[a]carbazole-1,4(11h)-dione, 11-phenyl-	mRNA	CD93	Expression	CellMiner	0.448381	0.00685242	-	-
									2-(1-piperazino)naphthazarin	mRNA	CD93	Expression	CellMiner	0.449434	0.01859	-	-
									2-hydroxy-2-deaminoactinomycin c	mRNA	CD93	Expression	CellMiner	0.449813	0.0313899	-	-
									hm-9	mRNA	CD93	Expression	CellMiner	0.449965	0.0165074	-	-
									6h-purine-6-thione, 1,9-dihydro-, gold complex	mRNA	CD93	Expression	CellMiner	0.449998	0.0306353	-	-
									artelasticin	mRNA	CD93	Expression	CellMiner	0.450876	0.0198498	0.452639	0.0155572
									propanedinitrile, [(3,5-dibromo-2-ethoxyphenyl)methylene]-	mRNA	CD93	Expression	CellMiner	0.451056	0.0166939	-	-
									quinoxaline, 2,3-bis(iodomethyl)-6-methoxy-	mRNA	CD93	Expression	CellMiner	0.451265	0.0097721	-	-
									isodiospyrin	mRNA	CD93	Expression	CellMiner	0.451367	0.0056486	-	-
									3,6-dibromo-2,7-dichloro-3-(chloromethyl)-7-methyl-1-octene	mRNA	CD93	Expression	CellMiner	0.451637	0.0166585	-	-
									pyronin b	mRNA	CD93	Expression	CellMiner	0.451657	0.00668587	-	-
									1,2,6-tribromo-3,7-dichloro-3,7-dimethyloctane	mRNA	CD93	Expression	CellMiner	0.453213	0.0308588	-	-
									stereoisomer of nsc 674067-p	mRNA	CD93	Expression	CellMiner	0.453337	0.00616151	-	-
									epidoxoform	mRNA	CD93	Expression	CellMiner	0.454057	0.0335367	-	-
									nogarene	mRNA	CD93	Expression	CellMiner	0.454331	0.00583195	-	-
									9-benzyl-6-(benzylthio)-9h-purin-2-amine	mRNA	CD93	Expression	CellMiner	0.454341	0.00993149	-	-
									phosphoramide mustard cyclohexylamine salt	mRNA	CD93	Expression	CellMiner	0.45446	0.0180113	-	-
									cysteine, s-[(4-aminocarbonyl-1h-imidazol-5-yl)azo]-	mRNA	CD93	Expression	CellMiner	0.454642	0.0298545	-	-
									n-bromoacetyltryptamine	mRNA	CD93	Expression	CellMiner	0.454943	0.0387945	-	-
									perfluorobenzophenone	mRNA	CD93	Expression	CellMiner	0.455148	0.00495389	0.411975	0.0370437
									Chlorambucil	mRNA	CD93	Expression	CellMiner	0.45516	0.017198	-	-
									rot c	mRNA	CD93	Expression	CellMiner	0.456338	0.016199	-	-
									arylpurines	mRNA	CD93	Expression	CellMiner	0.456642	0.0193801	-	-
									7,7'-methylenebis(5-nitroquinolin-8-ol)	mRNA	CD93	Expression	CellMiner	0.457443	0.0267754	-	-
									8-aniline-3,7-dimethyl-2,6-octadiene pyrophosphate	mRNA	CD93	Expression	CellMiner	0.45757	0.00737911	-	-
									hydroxypristimerin	mRNA	CD93	Expression	CellMiner	0.457616	0.0111021	-	-
									Etoposide	mRNA	CD93	Expression	CellMiner	0.457959	0.0198755	-	-
									dichapetalin a	mRNA	CD93	Expression	CellMiner	0.45809	0.0210679	-	-
									;(E)-3-(4-ethynylphenyl)-2-(2-(naphthalen-2-yl)vinyl)pyr...	mRNA	CD93	Expression	CellMiner	0.458682	0.0170086	-	-
									Hepsulfam	mRNA	CD93	Expression	CellMiner	0.459013	0.0197452	-	-
									crassin cinnamate	mRNA	CD93	Expression	CellMiner	0.45978	0.00373301	-	-
									6-phenylthio-7h-benzocycloheptene-1,4,7-trione	mRNA	CD93	Expression	CellMiner	0.460773	0.0042875	-	-
									buphanidrine, perchlorate	mRNA	CD93	Expression	CellMiner	0.46082	0.0171628	-	-
									indophenol, 2,6-dibromo-, monosodium salt	mRNA	CD93	Expression	CellMiner	0.462357	0.00598763	-	-
									1h-quinoxalin-2-one, 3-(bromomethyl)-7-(trifluoromethyl)-	mRNA	CD93	Expression	CellMiner	0.462561	0.0190452	-	-
									withafastuosin d diacetate	mRNA	CD93	Expression	CellMiner	0.462695	0.00359252	-	-
									rietone 1	mRNA	CD93	Expression	CellMiner	0.462811	0.00707808	-	-
									pomiferin	mRNA	CD93	Expression	CellMiner	0.46284	0.00867534	-	-
									rifamycin, 1,4-dideoxy-1,4-dihydro-1,4-dioxo-, 21-formate	mRNA	CD93	Expression	CellMiner	0.463266	0.00506546	-	-
									3-(tert-butyldimethylsilyloxymethyl)-3-butene-2-one	mRNA	CD93	Expression	CellMiner	0.46348	0.00440928	0.38177	0.0374884
									ramentaceone	mRNA	CD93	Expression	CellMiner	0.463639	0.00353754	-	-
									propanoic acid, 3-bromo-2-(bromomethyl)-, methyl ester	mRNA	CD93	Expression	CellMiner	0.464946	0.00726018	-	-
									nsc 708782 incorporated in micelles, 0.45% (w/w) of drug	mRNA	CD93	Expression	CellMiner	0.465027	0.0155782	-	-
									daunorubicin oxime hydrochloride	mRNA	CD93	Expression	CellMiner	0.465268	0.0124948	-	-
									Alectinib	mRNA	CD93	Expression	CellMiner	0.465463	0.0189245	-	-
									baccharinoid b4	mRNA	CD93	Expression	CellMiner	0.465565	0.0310308	-	-
									6-(bromomethyl)-1,4-anthracenedione.	mRNA	CD93	Expression	CellMiner	0.46576	0.00843003	-	-
									Mitozolomide	mRNA	CD93	Expression	CellMiner	0.466763	0.0404592	-	-
									1-(4-bromophenyl)-3-(1h-indazol-3-yl)urea	mRNA	CD93	Expression	CellMiner	0.467695	0.00886264	-	-
									thioflavine s	mRNA	CD93	Expression	CellMiner	0.467908	0.0188612	-	-
									5,8-quinolinedione, 2-chloro-6-methoxy-4-methyl-7-propyl-	mRNA	CD93	Expression	CellMiner	0.468327	0.00414105	-	-
									miliusate	mRNA	CD93	Expression	CellMiner	0.468658	0.00915542	-	-
									atpu	mRNA	CD93	Expression	CellMiner	0.468909	0.0337978	-	-
									5-(m-benzyloxy)benzylbarbituric acid	mRNA	CD93	Expression	CellMiner	0.469095	0.00938441	-	-
									b676297k277 3',4'-deoxypsorospermin 3',4'-chlorohydrin	mRNA	CD93	Expression	CellMiner	0.469231	0.00840924	-	-
									antineoplastic-690266	mRNA	CD93	Expression	CellMiner	0.469516	0.032225	-	-
									stereoisomer of nsc 674066-o	mRNA	CD93	Expression	CellMiner	0.469768	0.00851407	-	-
									1-aziridinecarboxamide, n,n'-hexamethylenebis(2-methyl-	mRNA	CD93	Expression	CellMiner	0.470018	0.0271052	-	-
									antineoplastic-690270	mRNA	CD93	Expression	CellMiner	0.470675	0.00769536	-	-
									PCNU	mRNA	CD93	Expression	CellMiner	0.471019	0.0129675	-	-
									Pipobroman	mRNA	CD93	Expression	CellMiner	0.471219	0.0141579	-	-
									3-iodoacetamido-benzoic acid ethyl ester	mRNA	CD93	Expression	CellMiner	0.472065	0.0110157	-	-
									hymenialdisine	mRNA	CD93	Expression	CellMiner	0.472206	0.0483825	-	-
									6-[4-(1-cyclohexenyl)-1,3-butadiyn-1-yl]-2(2h)-pyranone	mRNA	CD93	Expression	CellMiner	0.472412	0.0487462	-	-
									isostrychnopentamine a trihydrochloride	mRNA	CD93	Expression	CellMiner	0.47298	0.00433631	-	-
									redoxal	mRNA	CD93	Expression	CellMiner	0.473182	0.0159639	-	-
									dihydrogeiparvarim	mRNA	CD93	Expression	CellMiner	0.473721	0.0138157	-	-
									2,5-bis(3-amino-2,4,6-trinitrophenyl)-1,3,4-thiadiazole	mRNA	CD93	Expression	CellMiner	0.47451	0.0274633	-	-
									1,5-dihydroxy-1,5-di(pyridin-3-yl)pentan-3-one	mRNA	CD93	Expression	CellMiner	0.475209	0.00290644	-	-
									3-amino-n-(4-benzylphenyl)-1h-indazole-1-carboxamide	mRNA	CD93	Expression	CellMiner	0.475558	0.0399744	-	-
									2-methyl-4,5,6-trichloropyrimidine	mRNA	CD93	Expression	CellMiner	0.476654	0.00716183	-	-
									bis(2-nitrophenyl)sulfilimine	mRNA	CD93	Expression	CellMiner	0.47698	0.0101693	-	-
									2,3,6-tribromo-7-chloro-3,7-dimethyl-1-octene	mRNA	CD93	Expression	CellMiner	0.476982	0.00314898	-	-
									celsioside	mRNA	CD93	Expression	CellMiner	0.477062	0.0117969	-	-
									stilbene, 4-hydroxy-4'-methoxy-, (z)-	mRNA	CD93	Expression	CellMiner	0.477129	0.00406138	-	-
									6-chloro-7-[4'-(pyridyl)piperazino]-5,8-quinolinedione	mRNA	CD93	Expression	CellMiner	0.477882	0.00573616	0.429967	0.0301281
									prodigiosine methyl ketone	mRNA	CD93	Expression	CellMiner	0.477917	0.0228312	-	-
									rebeccamycin	mRNA	CD93	Expression	CellMiner	0.478478	0.012552	-	-
									6-hydroxyundulatine	mRNA	CD93	Expression	CellMiner	0.478982	0.0074804	-	-
									3-bromoacetamido-benzoic acid ethyl ester	mRNA	CD93	Expression	CellMiner	0.47908	0.0198194	-	-
									1h-benzo[a]carbazole-1,4(11h)-dione, 8-methoxy-	mRNA	CD93	Expression	CellMiner	0.480081	0.00240737	-	-
									shikoccin	mRNA	CD93	Expression	CellMiner	0.48034	0.00362444	-	-
									6h-purine-6-thione, 2-amino-1,9-dihydro-, gold complex	mRNA	CD93	Expression	CellMiner	0.480608	0.0148974	-	-
									2,4(1h,3h)-pyrimidinedione, 6-[(3,4-dichlorophenyl)azo]-	mRNA	CD93	Expression	CellMiner	0.480771	0.00650506	-	-
									3,5-dimethoxy-beta-methyl-beta-nitrostyrene	mRNA	CD93	Expression	CellMiner	0.48081	0.00336782	-	-
									olpizan	mRNA	CD93	Expression	CellMiner	0.480837	0.00835177	0.402379	0.040492
									1-(1h-indazol-3-yl)-3-[2-(trifluoromethoxy)phenyl]urea	mRNA	CD93	Expression	CellMiner	0.481052	0.00929597	-	-
									mmp-9/mmp-13 inhibitor ll calbiochem cat. no. 444253	mRNA	CD93	Expression	CellMiner	0.481677	0.0466803	-	-
									2-amino-4-(2-hydroxy-4-methylphenyl)-5-phenylpyrimidine	mRNA	CD93	Expression	CellMiner	0.48179	0.00373981	-	-
									antineoplastic-651590	mRNA	CD93	Expression	CellMiner	0.482064	0.00322508	-	-
									4-butanediyldihydroguaiaretic acid	mRNA	CD93	Expression	CellMiner	0.48236	0.00239713	-	-
									merbarone	mRNA	CD93	Expression	CellMiner	0.48282	0.00682926	-	-
									1-cyclobuten-3-one, 4,4-dichloro-1-pentyl-	mRNA	CD93	Expression	CellMiner	0.482972	0.0028218	-	-
									indolo[3,4-d]benzazepin-6(5h)-one, 9-cyano-7,12-dihydro-	mRNA	CD93	Expression	CellMiner	0.483625	0.00907954	-	-
									arnebin	mRNA	CD93	Expression	CellMiner	0.484031	0.00305312	-	-
									22-hydroxytingenone	mRNA	CD93	Expression	CellMiner	0.484702	0.00510419	-	-
									flavofungin	mRNA	CD93	Expression	CellMiner	0.484959	0.00337318	0.36756	0.0492318
									c4, carbonyl, ethyl prodigiosine	mRNA	CD93	Expression	CellMiner	0.485116	0.00334499	-	-
									benzeneamine, 4-[(9-acridinyl)thio]-	mRNA	CD93	Expression	CellMiner	0.485231	0.00218288	-	-
									epoxypiperazine	mRNA	CD93	Expression	CellMiner	0.485796	0.00564574	-	-
									antineoplastic-690269	mRNA	CD93	Expression	CellMiner	0.485801	0.00463121	-	-
									thymophthalein	mRNA	CD93	Expression	CellMiner	0.486029	0.00195177	-	-
									gw406731x	mRNA	CD93	Expression	CellMiner	0.486204	0.00270517	-	-
									quinacrine mustard	mRNA	CD93	Expression	CellMiner	0.487988	0.00516416	-	-
									(24s)-24-o-acetyl,-7,8-didehydroshengmanol xyloside	mRNA	CD93	Expression	CellMiner	0.488092	0.00259249	-	-
									ethoxycurcumin trithiadiazolaminomethylcarbonte	mRNA	CD93	Expression	CellMiner	0.488307	0.00257604	-	-
									u-22265	mRNA	CD93	Expression	CellMiner	0.488547	0.00430389	-	-
									mitaplatin	mRNA	CD93	Expression	CellMiner	0.488945	0.0119892	-	-
									benzofurazan, 4-(4-morpholinyl)-7-nitro-, 3-oxide	mRNA	CD93	Expression	CellMiner	0.489427	0.0406424	-	-
									4-chloro-6,7-dimethoxy-2-(2-thienyl)quinazoline	mRNA	CD93	Expression	CellMiner	0.489715	0.00739678	-	-
									withaferin-a diacetate	mRNA	CD93	Expression	CellMiner	0.490217	0.00237132	-	-
									cis-amminedichloro(4-methoxyphenethylamine)platinum(ii)	mRNA	CD93	Expression	CellMiner	0.490765	0.00279511	-	-
									galiellalactone	mRNA	CD93	Expression	CellMiner	0.490785	0.0151041	-	-
									Melphalan	mRNA	CD93	Expression	CellMiner	0.49105	0.0088749	-	-
									diosgenin tetraglycoside	mRNA	CD93	Expression	CellMiner	0.491885	0.0180673	-	-
									2-hydroxy-4-(2-(tosyloxy)acetamido)benzoic acid	mRNA	CD93	Expression	CellMiner	0.492576	0.00955044	-	-
									indole-2,3-dione, 3-[(pentafluorophenyl)hydrazone]	mRNA	CD93	Expression	CellMiner	0.492905	0.00220423	-	-
									chalcone,2-hydroxy-4,6-dimethyl	mRNA	CD93	Expression	CellMiner	0.493156	0.0490016	-	-
									pyrimidine, 2,4,6-trichloro-5-heptyl-	mRNA	CD93	Expression	CellMiner	0.495254	0.0082668	-	-
									isovelleral	mRNA	CD93	Expression	CellMiner	0.495984	0.00153144	-	-
									sb-741905	mRNA	CD93	Expression	CellMiner	0.496634	0.00632093	-	-
									2-butene, 1,1,2,4,4-pentachloro-1,4-dinitro-	mRNA	CD93	Expression	CellMiner	0.497903	0.0123581	-	-
									thapsuine a	mRNA	CD93	Expression	CellMiner	0.49818	0.00500271	-	-
									cirensenoxide g	mRNA	CD93	Expression	CellMiner	0.498201	0.000959307	-	-
									trunculin a	mRNA	CD93	Expression	CellMiner	0.498699	0.0054051	-	-
									2-chloro-3-(2-chloroethoxy)-naphthazarin	mRNA	CD93	Expression	CellMiner	0.498739	0.00134841	0.399291	0.0406347
									n-(2-iodylphenyl)-n-methylpivalamide	mRNA	CD93	Expression	CellMiner	0.49977	0.00122622	-	-
									1h-benzocycloheptene-1,4,7-trione, 4,7-dihydro-	mRNA	CD93	Expression	CellMiner	0.500594	0.00202497	-	-
									trichlorotris-3-(t-butyl)pyrazoleruthenium(iii)	mRNA	CD93	Expression	CellMiner	0.501729	0.000807913	0.375285	0.0422274
									1,4-naphthalenedione, 5-methoxy-	mRNA	CD93	Expression	CellMiner	0.50208	0.00124673	0.458915	0.0143898
									wln: t56 bn dn fn hnj d4 is1	mRNA	CD93	Expression	CellMiner	0.502123	0.00364655	-	-
									1h-imidazole-4-carboxamide, 5-(3-methyl-1-tetrazenyl)-	mRNA	CD93	Expression	CellMiner	0.502682	0.0116865	-	-
									dijodbenzotef	mRNA	CD93	Expression	CellMiner	0.50269	0.0113117	-	-
									macrocalyxoformin b (rabdosia diterpenoids)	mRNA	CD93	Expression	CellMiner	0.503244	0.0348355	-	-
									2-propenone, 1,1'-(2,5-pyridinediyl)bis[3-(2-furanyl)-	mRNA	CD93	Expression	CellMiner	0.503894	0.00225389	0.387445	0.0497404
									1,4-naphthalenedione, 7-(benzoyloxy)-5-methoxy-	mRNA	CD93	Expression	CellMiner	0.504727	0.00126089	0.39841	0.0448314
									acetylrolandrolide	mRNA	CD93	Expression	CellMiner	0.505022	0.0042616	-	-
									bromodeoxytopsentin	mRNA	CD93	Expression	CellMiner	0.505982	0.00256043	-	-
									Dacarbazine	mRNA	CD93	Expression	CellMiner	0.506079	0.00816033	-	-
									calystegine b2	mRNA	CD93	Expression	CellMiner	0.506447	0.0019089	-	-
									hymenolide	mRNA	CD93	Expression	CellMiner	0.507432	0.00299216	-	-
									Clomesone	mRNA	CD93	Expression	CellMiner	0.50749	0.0155833	-	-
									Fluorodopan	mRNA	CD93	Expression	CellMiner	0.507494	0.00174912	-	-
									trichlorotris(4-tert-butylpyridine)ruthenium(iii)	mRNA	CD93	Expression	CellMiner	0.508353	0.00222245	-	-
									2-propyn-1-one, 3-(2,4-dimethoxy-5-pyrimidinyl)-1-phenyl-	mRNA	CD93	Expression	CellMiner	0.509372	0.00487459	-	-
									3-chloro-7-nitro-1,2,4-benzotriazine 1-oxide	mRNA	CD93	Expression	CellMiner	0.509853	0.00131272	-	-
									2-chloro-3-[2-(2-butoxyethoxy)ethoxy]-naphthazarin	mRNA	CD93	Expression	CellMiner	0.510186	0.000968559	0.411131	0.047524
									1h-inden-1-one, 2-bromo-2,3-dihydro-2-methyl-	mRNA	CD93	Expression	CellMiner	0.5105	0.00748123	-	-
									buddledin c	mRNA	CD93	Expression	CellMiner	0.510935	0.00205745	-	-
									3,3-diiodo-2-phenyl-2-propenal	mRNA	CD93	Expression	CellMiner	0.511822	0.0011465	0.44501	0.0325426
									benzo[1,2-b:4,5-b']-dithiophene-4,8-dione, 2,6-dinitro-	mRNA	CD93	Expression	CellMiner	0.511897	0.00252584	-	-
									bicyclo[3.3.1]non-3-en-2-ol-7-one	mRNA	CD93	Expression	CellMiner	0.512643	0.00293066	-	-
									landomycin e	mRNA	CD93	Expression	CellMiner	0.513021	0.000928754	-	-
									3-methoxy-estra-1,3,5(10)-triene-(17,16-c)pyrazole	mRNA	CD93	Expression	CellMiner	0.513329	0.00138091	-	-
									benzenamine, 4-ethoxy-n-[(4-quinolinyl)methylene]-	mRNA	CD93	Expression	CellMiner	0.51521	0.00114727	-	-
									mikamycin, b grade	mRNA	CD93	Expression	CellMiner	0.515425	0.00156858	-	-
									aziridinyl benzoquinone	mRNA	CD93	Expression	CellMiner	0.518765	0.00795605	-	-
									LDK-378	mRNA	CD93	Expression	CellMiner	0.521766	0.00202304	-	-
									benzene, 1-[[2-chloro-1-(chloromethyl)ethyl]thio]-4-fluoro-	mRNA	CD93	Expression	CellMiner	0.522015	0.00135133	-	-
									sulfoquinovoside	mRNA	CD93	Expression	CellMiner	0.522917	0.00196177	-	-
									kusaginin	mRNA	CD93	Expression	CellMiner	0.526504	0.00371349	-	-
									benzyl-4-(benzyloxy)-5,6-dimethylpicolinate	mRNA	CD93	Expression	CellMiner	0.526586	0.000896241	-	-
									Inosine dialdehyde	mRNA	CD93	Expression	CellMiner	0.527296	0.00134246	0.481701	0.00915319
									2-(chloromethyl)-1,3-dinitro-5-(trifluoromethyl)benzene	mRNA	CD93	Expression	CellMiner	0.529057	0.00280131	-	-
									acetic acid, [[(4-methoxyphenyl)sulfonyl]hydrazono]- (9ci)	mRNA	CD93	Expression	CellMiner	0.529305	0.0229702	-	-
									avarol	mRNA	CD93	Expression	CellMiner	0.52962	0.00127976	-	-
									2-chloro-3-[1-(4-(2-pyrimidyl)piperazine)]-naphthazarin	mRNA	CD93	Expression	CellMiner	0.530348	0.00121163	-	-
									rohituka 7	mRNA	CD93	Expression	CellMiner	0.530608	0.00258076	-	-
									Yoshi 864	mRNA	CD93	Expression	CellMiner	0.531849	0.00294527	-	-
									myristoyl hydroxamate	mRNA	CD93	Expression	CellMiner	0.532623	0.000662605	-	-
									allyl disulfide	mRNA	CD93	Expression	CellMiner	0.535876	0.0003297	-	-
									1,3-isoquinolinedione, 4-[(3,4-dimethoxyphenyl)methylene]-	mRNA	CD93	Expression	CellMiner	0.536307	0.000752473	-	-
									3,6-di(trifluoromethyl)-2-furoylquinoxaline 1,4-dioxide	mRNA	CD93	Expression	CellMiner	0.536857	0.000870445	-	-
									7h-5,6-dithioleno[4,3-d]uracil	mRNA	CD93	Expression	CellMiner	0.537368	0.00130168	-	-
									1,3-dithiolo[3,4-d]pyrimidine-2-thione, 5,7-dichloro-	mRNA	CD93	Expression	CellMiner	0.538003	0.000207965	0.415634	0.0242558
									ethericin a	mRNA	CD93	Expression	CellMiner	0.53864	0.00650769	-	-
									7-fluoro-2-benzoyl-3-trifluoromethylquioxaline 1,4-dioxide	mRNA	CD93	Expression	CellMiner	0.538712	0.00250668	-	-
									Imexon	mRNA	CD93	Expression	CellMiner	0.53972	0.000473994	-	-
									(-)-avarol	mRNA	CD93	Expression	CellMiner	0.539751	0.000651381	-	-
									3-acridineamine, 9-[[(4-nitrophenyl)methyl]thio]-	mRNA	CD93	Expression	CellMiner	0.540714	0.000345621	0.423291	0.02774
									(s)-(+)-n-1-(3,5-dimethoxybenzyl)ethyl acetamide	mRNA	CD93	Expression	CellMiner	0.542889	0.000867911	-	-
									perfragilin b	mRNA	CD93	Expression	CellMiner	0.543749	0.000889965	-	-
									4-thiomorpholinecarbodithioic acid, antimony complex	mRNA	CD93	Expression	CellMiner	0.544446	0.000531763	0.402593	0.0219603
									rifa	mRNA	CD93	Expression	CellMiner	0.544807	0.000954014	-	-
									c8, carbonyl prodigiosine	mRNA	CD93	Expression	CellMiner	0.546337	0.00240755	-	-
									hexyl diethylcarbamo(dithioperoxo)thioate	mRNA	CD93	Expression	CellMiner	0.547317	0.000827475	-	-
									arsenobenzene	mRNA	CD93	Expression	CellMiner	0.547712	0.0495475	-	-
									anguidin	mRNA	CD93	Expression	CellMiner	0.54775	0.00553874	-	-
									2-chloro-3-(2-hydroxy-1,1-dimethyl-ethylamino)naphthazarin	mRNA	CD93	Expression	CellMiner	0.548395	0.000690333	-	-
									dregeoside ao1	mRNA	CD93	Expression	CellMiner	0.548492	0.000860536	-	-
									4-aminopiazthiole	mRNA	CD93	Expression	CellMiner	0.55408	0.000233926	0.453798	0.0298668
									2-aminonaphthiazole	mRNA	CD93	Expression	CellMiner	0.554863	0.000440705	-	-
									u 20043	mRNA	CD93	Expression	CellMiner	0.556137	0.000419689	-	-
									hydrazine sulfate	mRNA	CD93	Expression	CellMiner	0.558376	0.00212452	-	-
									naphthalene, 1,4-bis(oxiranylmethoxy)-	mRNA	CD93	Expression	CellMiner	0.559539	0.00137085	-	-
									squamone	mRNA	CD93	Expression	CellMiner	0.560346	0.000534953	-	-
									4-(3-carboxy-quinoxalin-2-yl)-oxyphenylacetyl acid	mRNA	CD93	Expression	CellMiner	0.5615	0.000323129	-	-
									Mercuric Chloride	mRNA	CD93	Expression	CellMiner	0.561872	0.000425389	0.424124	0.0406107
									2-chloro-3-(3-chloro-propyloxy)-naphthazarin	mRNA	CD93	Expression	CellMiner	0.56488	0.000148435	-	-
									Lomustine	mRNA	CD93	Expression	CellMiner	0.566345	0.00167305	-	-
									1,1'-biphenyl, 4,4'bis(thiomethyl)-	mRNA	CD93	Expression	CellMiner	0.566539	0.000846068	-	-
									azobis-n,n'-dimethyleneisobutyroamidine	mRNA	CD93	Expression	CellMiner	0.566551	0.000277913	-	-
									aplysinamisine iii	mRNA	CD93	Expression	CellMiner	0.567521	0.000268494	-	-
									flavone acetic acid	mRNA	CD93	Expression	CellMiner	0.568599	0.000341546	-	-
									dehydroepiandrosterone mustard	mRNA	CD93	Expression	CellMiner	0.572296	0.000217063	-	-
									c4 ester, carbonyl adjacent to prodigiosine, hcl salt	mRNA	CD93	Expression	CellMiner	0.572543	0.00587311	-	-
									3-amino-n-(4-butoxyphenyl)-1h-indazole-1-carboxamide	mRNA	CD93	Expression	CellMiner	0.573245	6.3e-05	-	-
									nickel meso formyl etioporphyrin	mRNA	CD93	Expression	CellMiner	0.576052	0.000181699	-	-
									benzo[1,2-b:4,5-b']dithiophene-4,8-dione, 2-nitro-	mRNA	CD93	Expression	CellMiner	0.576277	0.000364575	-	-
									roserine	mRNA	CD93	Expression	CellMiner	0.57628	0.000202022	-	-
									asn-gln-trp-ala-val-gly-(d)phe-leu-met-nh2	mRNA	CD93	Expression	CellMiner	0.577796	0.00016726	-	-
									ent-9a,13-dihydroxy-16,17-epoxy-kauran-19-oic acid	mRNA	CD93	Expression	CellMiner	0.579211	0.000149806	-	-
									Methyl CCNU	mRNA	CD93	Expression	CellMiner	0.579844	0.000205571	-	-
									calcein am	mRNA	CD93	Expression	CellMiner	0.579863	0.000217903	-	-
									funiferine	mRNA	CD93	Expression	CellMiner	0.581068	0.0015746	-	-
									n-decyl-2-iodoacetamide	mRNA	CD93	Expression	CellMiner	0.581913	0.00301257	-	-
									uvidin a	mRNA	CD93	Expression	CellMiner	0.582269	0.000211191	-	-
									hygrophylline	mRNA	CD93	Expression	CellMiner	0.583682	0.000122873	-	-
									benzo[1,2-b:4,5-b']dithiophene-4,8-dione, 2,7-dinitro-	mRNA	CD93	Expression	CellMiner	0.585245	0.000360813	-	-
									2-octene, 1-bromo-3-(bromomethyl)-2,6,7-trichloro-7-methyl-	mRNA	CD93	Expression	CellMiner	0.586345	0.000255961	-	-
									mannich bases	mRNA	CD93	Expression	CellMiner	0.586656	0.000242346	-	-
									3,6-dimethylthio-dihydrotetrazine	mRNA	CD93	Expression	CellMiner	0.587389	7.39e-05	-	-
									pyrimidine, 2,4,6-trichloro-5-pentyl-	mRNA	CD93	Expression	CellMiner	0.589711	0.000322404	-	-
									Buthionine sulphoximine	mRNA	CD93	Expression	CellMiner	0.589736	0.00234879	-	-
									;6-Nitro-2-(3-chloropropyl)-1H-benz[de]isoquinoline-1,3-...	mRNA	CD93	Expression	CellMiner	0.589938	0.000629258	-	-
									ambivalon hydrochloride	mRNA	CD93	Expression	CellMiner	0.590524	0.000600844	-	-
									2-bromo-6-methyl-1,4,8-trimethoxynaphthalene	mRNA	CD93	Expression	CellMiner	0.5922	6.95e-05	-	-
									casuarine	mRNA	CD93	Expression	CellMiner	0.593635	5.84e-05	-	-
									inolene	mRNA	CD93	Expression	CellMiner	0.593711	9.23e-05	-	-
									dichlorobis(3-phenylpentane-2,4-dionato)hafnium(iv)	mRNA	CD93	Expression	CellMiner	0.594384	0.00925017	-	-
									budmunchiamine a	mRNA	CD93	Expression	CellMiner	0.594613	5.93e-05	-	-
									5-epi-phomopsolide d	mRNA	CD93	Expression	CellMiner	0.595089	3.3e-05	-	-
									cps49	mRNA	CD93	Expression	CellMiner	0.59545	0.000174476	-	-
									wln: t56 bnonj bo fnw i- at6n dntj dr d1	mRNA	CD93	Expression	CellMiner	0.596286	5.48e-05	-	-
									6-bromo-4-[(3-bromophenyl)amino]-2-(2-thienyl)quinazoline	mRNA	CD93	Expression	CellMiner	0.597475	0.000125821	-	-
									oil red b	mRNA	CD93	Expression	CellMiner	0.599293	5.51e-05	-	-
									eriolangin	mRNA	CD93	Expression	CellMiner	0.601103	5.85e-05	-	-
									3-formyl-8,8-dimethylbicyclo[3.2.1]octan-2-one	mRNA	CD93	Expression	CellMiner	0.602072	4.87e-05	-	-
									3-(2-furyl)acrolein	mRNA	CD93	Expression	CellMiner	0.602911	3.79e-05	-	-
									methanediamine, 1-(2-chlorophenyl)-n,n'-dipyrazinyl-	mRNA	CD93	Expression	CellMiner	0.611743	2.94e-05	-	-
									thymidine, 5'-[(bromoacetyl)amino]-5'-deoxy-	mRNA	CD93	Expression	CellMiner	0.612764	4.09e-05	-	-
									ethoxytris(2-methyl-8-chinolineolato)titanium(iv)	mRNA	CD93	Expression	CellMiner	0.614086	2.12e-05	-	-
									5,6-quinolinedione	mRNA	CD93	Expression	CellMiner	0.614407	2.88e-05	-	-
									n-benzyl-n-(2-iodylphenyl)acetamide	mRNA	CD93	Expression	CellMiner	0.614557	2.88e-05	0.45197	0.0299007
									light orange r	mRNA	CD93	Expression	CellMiner	0.616969	1.9e-05	-	-
									trichodermin	mRNA	CD93	Expression	CellMiner	0.619142	0.00112123	-	-
									di-o-methylthujaplicatin methyl ether	mRNA	CD93	Expression	CellMiner	0.624835	1.66e-05	-	-
									4a,5a-epoxyhelianol	mRNA	CD93	Expression	CellMiner	0.627997	4.68e-05	-	-
									mercury, chloro-2-naphthalenyl-	mRNA	CD93	Expression	CellMiner	0.629235	0.000202338	-	-
									andrastin a	mRNA	CD93	Expression	CellMiner	0.640457	2.33e-06	0.427655	0.0307451
									Rebimastat	mRNA	CD93	Expression	CellMiner	0.640605	1.56e-05	-	-
									st-daae-1,4-(ii)	mRNA	CD93	Expression	CellMiner	0.644211	1.56e-05	-	-
									Carmustine	mRNA	CD93	Expression	CellMiner	0.644573	1.17e-05	-	-
									2(1h)-quinoxalinone, 3-(bromomethyl)-	mRNA	CD93	Expression	CellMiner	0.645468	1.31e-05	0.410246	0.0495428
									sellowin a	mRNA	CD93	Expression	CellMiner	0.646995	4.66e-05	-	-
									cyclohexyl diethylcarbamo(dithioperoxo)thioate	mRNA	CD93	Expression	CellMiner	0.649285	3.46e-06	0.449496	0.03757
									1h-imidazole-4-carboxamide, 5-thiocyanato-	mRNA	CD93	Expression	CellMiner	0.668018	7.21e-07	-	-
									parthenolid-8-one	mRNA	CD93	Expression	CellMiner	0.67684	4.86e-05	-	-
									1h-imidazole-4,5-dicarboxylic acid, 2-phenyl- (9ci)	mRNA	CD93	Expression	CellMiner	0.677086	5.32e-07	0.388306	0.0390649
									silver, (6,6,7,7,8,8,8-heptafluoro-3,5-octanedionato-o,o')-	mRNA	CD93	Expression	CellMiner	0.705357	3.49e-07	-	-
									rutacridone epoxide	mRNA	CD93	Expression	CellMiner	0.713595	6.39e-07	-	-
									red l	mRNA	CD93	Expression	CellMiner	0.716798	4.41e-08	-	-
									3,3',5,5'-tetramethyl-n,n-bis(pyrazol-1-ylmethyl)aniline	mRNA	CD93	Expression	CellMiner	0.795954	4.94e-10	-	-
									1,1,3-tribromo-3-methyl-2-butanone	mRNA	CD93	Expression	CellMiner	-	-	0.428526	0.041213
									1,4-pentadien-3-one, 1,5-di-3-pyridyl-	mRNA	CD93	Expression	CellMiner	-	-	0.388434	0.0296621
									1-piperidinecarbodithioic acid, antimony complex	mRNA	CD93	Expression	CellMiner	-	-	0.388204	0.035891
									2-[(z)-bromoiodomethylidene] cyclohexanone	mRNA	CD93	Expression	CellMiner	-	-	0.412512	0.0171727
									2-amino-5,8-dihydroxy-1,4-naphthoquinone	mRNA	CD93	Expression	CellMiner	-	-	0.349058	0.0477283
									2-azabicyclo[16.3.1]docosane, geldanamycin deriv.	mRNA	CD93	Expression	CellMiner	-	-	0.371228	0.0498967
									4-piperidinopyrazolo[3,4-d]pyrimidin-6-thion	mRNA	CD93	Expression	CellMiner	-	-	0.449633	0.0208583
									5-methoxy, 4'-hydroxy,3-prenyl 7-o-rhamnopyranosido flavone	mRNA	CD93	Expression	CellMiner	-	-	0.462562	0.0375939
									7-nitro-1,2,4-benzotriazin-3-amine-1,4-dioxide	mRNA	CD93	Expression	CellMiner	-	-	0.475789	0.0112812
									8-hydroxy-3-phenylisocoumarin	mRNA	CD93	Expression	CellMiner	-	-	-0.44297	0.0258005
									;9-(3-fluorobenzyl)-7-(3-fluorobenzyloxy)-2-(4-fluoroben...	mRNA	CD93	Expression	CellMiner	-	-	0.49547	0.01343
									;9-benzyl-7-benzyloxy-2-benzyl-1-methyl-9H-carbolinium b...	mRNA	CD93	Expression	CellMiner	-	-	0.391807	0.0491952
									ammonium, trimethyl(1-phenyldodecyl)-, p-toluenesulfonate	mRNA	CD93	Expression	CellMiner	-	-	0.417306	0.044226
									artesunate	mRNA	CD93	Expression	CellMiner	-	-	0.415836	0.0272038
									artocarpesin	mRNA	CD93	Expression	CellMiner	-	-	0.511179	0.0264079
									Benzethonium Chloride	mRNA	CD93	Expression	CellMiner	-	-	0.41903	0.019536
									benzofurazan, 4-nitro-7-(2-pyridinylthio)-, n-oxide	mRNA	CD93	Expression	CellMiner	-	-	0.389176	0.0329773
									benzonitrile, 4-(3-oxo-3-phenyl-1-propenyl)-	mRNA	CD93	Expression	CellMiner	-	-	0.388995	0.0416672
									carbomycin	mRNA	CD93	Expression	CellMiner	-	-	0.39978	0.0431037
									cis-dichlorobis(4-methoxyphenethylamine)platinum(ii)	mRNA	CD93	Expression	CellMiner	-	-	0.362882	0.0492963
									discorhabdin c . tfa	mRNA	CD93	Expression	CellMiner	-	-	0.376396	0.036043
									fumidil	mRNA	CD93	Expression	CellMiner	-	-	0.46591	0.0362009
									gab-geldanamycin	mRNA	CD93	Expression	CellMiner	-	-	0.397038	0.0266567
									geldanamicin	mRNA	CD93	Expression	CellMiner	-	-	0.400659	0.0328418
									il4(38-37)-pe38kdel	mRNA	CD93	Expression	CellMiner	-	-	-0.463109	0.0319234
									isothan	mRNA	CD93	Expression	CellMiner	-	-	0.469354	0.04183
									juncusol deriv (compound 1)	mRNA	CD93	Expression	CellMiner	-	-	0.464576	0.00927287
									klot	mRNA	CD93	Expression	CellMiner	-	-	0.361519	0.0494596
									l-cysteine analog	mRNA	CD93	Expression	CellMiner	-	-	0.396685	0.0470065
									Macbecin II	mRNA	CD93	Expression	CellMiner	-	-	0.430189	0.0153892
									melicopidine	mRNA	CD93	Expression	CellMiner	-	-	0.428687	0.0163857
									methylbenzethonium chloride (usan)	mRNA	CD93	Expression	CellMiner	-	-	0.502773	0.0149028
									methylundecylpiperidine, trans	mRNA	CD93	Expression	CellMiner	-	-	0.421811	0.0136666
									n8-actinomycin d	mRNA	CD93	Expression	CellMiner	-	-	0.390618	0.0452088
									propanethioamide, n-hydroxy-n-methyl-	mRNA	CD93	Expression	CellMiner	-	-	0.406325	0.0217249
									pyrimidin-2-amine, 4-(2-hydroxy-4-methoxyphenyl)-6-phenyl-	mRNA	CD93	Expression	CellMiner	-	-	0.46344	0.0459643
									rhodium dimer	mRNA	CD93	Expression	CellMiner	-	-	0.38315	0.0446145
									sddc	mRNA	CD93	Expression	CellMiner	-	-	0.458834	0.0164828
									sempervirine, nitrate, dihydrate	mRNA	CD93	Expression	CellMiner	-	-	0.44996	0.0108004
									thiosangivamycin	mRNA	CD93	Expression	CellMiner	-	-	0.42289	0.0226978
									tp4ek	mRNA	CD93	Expression	CellMiner	-	-	-0.408762	0.0211391
									usaf sn-31	mRNA	CD93	Expression	CellMiner	-	-	0.412944	0.0293956
									2-[(3,4-dicloro)anilino]-3-phenyl-5,7-diamino quinoxaline	mRNA	CD93	Methylation	CellMiner	-0.607319	0.00368133	-	-
									janus red	mRNA	CD93	Methylation	CellMiner	-0.541782	0.0132921	-0.579842	0.00330774
									juncusol deriv (compound 1)	mRNA	CD93	Methylation	CellMiner	-0.535169	0.00545147	-0.512956	0.00393377
									1,4-benzenediamine (9ci), n-butyl-n'-phenyl-	mRNA	CD93	Methylation	CellMiner	-0.533308	0.00396612	-0.504081	0.00529948
									1-benzyl-3-hexadecyl-2-methylimidazolium chloride	mRNA	CD93	Methylation	CellMiner	-0.525735	0.011673	-0.521954	0.0138427
									safranin bluish	mRNA	CD93	Methylation	CellMiner	-0.516982	0.0251334	-0.477249	0.018615
									nabor orange r	mRNA	CD93	Methylation	CellMiner	-0.513512	0.00246291	-0.521194	0.00456087
									phidianidine a	mRNA	CD93	Methylation	CellMiner	-0.498034	0.0421473	-0.52326	0.0178335
									vancide 26	mRNA	CD93	Methylation	CellMiner	-0.494681	0.0254975	-0.53504	0.0087906
									Arsenic trioxide	mRNA	CD93	Methylation	CellMiner	-0.494407	0.0459162	-	-
									Benzethonium Chloride	mRNA	CD93	Methylation	CellMiner	-0.494296	0.00928037	-0.546385	0.000786099
									1-decyl-3-methylimidazolium tetrafluoroborate	mRNA	CD93	Methylation	CellMiner	-0.48739	0.0216154	-	-
									Rubremetinium chloride	mRNA	CD93	Methylation	CellMiner	-0.487072	0.0130119	-0.468847	0.0212134
									;9-(3-fluorobenzyl)-7-(3-fluorobenzyloxy)-2-(4-fluoroben...	mRNA	CD93	Methylation	CellMiner	-0.485314	0.03461	-0.493803	0.035522
									g-tpp	mRNA	CD93	Methylation	CellMiner	-0.484296	0.00702222	-0.502348	0.00227299
									n-Laurylpyridinium chloride	mRNA	CD93	Methylation	CellMiner	-0.484125	0.0281274	-0.552662	0.0155381
									avarol	mRNA	CD93	Methylation	CellMiner	-0.481887	0.0209984	-	-
									nonactin	mRNA	CD93	Methylation	CellMiner	-0.477671	0.0291318	-0.374706	0.0432761
									tptz	mRNA	CD93	Methylation	CellMiner	-0.477233	0.0168379	-	-
									berberine iodide	mRNA	CD93	Methylation	CellMiner	-0.476186	0.0471126	-0.476985	0.0160197
									mito-tempol	mRNA	CD93	Methylation	CellMiner	-0.47262	0.00548548	-0.445033	0.017452
									mercury, chloro-2-naphthalenyl-	mRNA	CD93	Methylation	CellMiner	-0.472105	0.0397473	-0.45728	0.0198412
									benzo[1,2-b:4,5-b']-dithiophene-4,8-dione, 2,6-dinitro-	mRNA	CD93	Methylation	CellMiner	-0.47023	0.00962256	-	-
									indoline, 5-chloro-1,3,3-trimethyl-2-methylene- (8ci)	mRNA	CD93	Methylation	CellMiner	-0.469723	0.0161275	-0.453352	0.0135489
									berberine chloride	mRNA	CD93	Methylation	CellMiner	-0.463654	0.0156367	-0.472448	0.0167659
									2-chloro-1,7-dimethyl-phenothiazone	mRNA	CD93	Methylation	CellMiner	-0.459004	0.0471924	-	-
									benzo[1,2-b:4,5-b']dithiophene-4,8-dione, 2,7-dinitro-	mRNA	CD93	Methylation	CellMiner	-0.458939	0.0342935	-	-
									vantoc cl	mRNA	CD93	Methylation	CellMiner	-0.456946	0.0421009	-	-
									di-o-methylthujaplicatin methyl ether	mRNA	CD93	Methylation	CellMiner	-0.455587	0.030517	-	-
									wln: ro3pr&r&r &e &4/12	mRNA	CD93	Methylation	CellMiner	-0.454942	0.0390614	-0.495118	0.00773444
									8-aniline-3,7-dimethyl-2,6-octadiene pyrophosphate	mRNA	CD93	Methylation	CellMiner	-0.450837	0.029906	-	-
									8b-hydroxy-9b,10b-epoxyverrucarin a	mRNA	CD93	Methylation	CellMiner	-0.44602	0.0335925	-0.438069	0.0284522
									phosphonium, ethyldiphenyl(phenylethynyl)-, iodide	mRNA	CD93	Methylation	CellMiner	-0.445125	0.00937539	-0.437385	0.0290342
									1-methyl-3-octadecylimidazolium chloride	mRNA	CD93	Methylation	CellMiner	-0.441988	0.0268572	-	-
									benzo[1,2-b:4,5-b']dithiophene-4,8-dione, 2-nitro-	mRNA	CD93	Methylation	CellMiner	-0.441897	0.0417727	-	-
									Ethyl red	mRNA	CD93	Methylation	CellMiner	-0.438635	0.036555	-0.474469	0.0311313
									phosphonium, triphenylpropenyl-, bromide, (e)- (8ci)	mRNA	CD93	Methylation	CellMiner	-0.434674	0.0265932	-	-
									c4, carbonyl, ethyl prodigiosine	mRNA	CD93	Methylation	CellMiner	-0.432877	0.0450463	-	-
									landomycin e	mRNA	CD93	Methylation	CellMiner	-0.432335	0.0251247	-	-
									calystegine b2	mRNA	CD93	Methylation	CellMiner	-0.432175	0.0471548	-	-
									1-cyclobuten-3-one, 4,4-dichloro-1-pentyl-	mRNA	CD93	Methylation	CellMiner	-0.431168	0.0374109	-	-
									n-butyltriphenylphosphonium bromide	mRNA	CD93	Methylation	CellMiner	-0.42485	0.0428904	-0.4129	0.046168
									baccharin	mRNA	CD93	Methylation	CellMiner	-0.423996	0.0453378	-0.431485	0.0379334
									1-decyl-3-methylimidazolium chloride	mRNA	CD93	Methylation	CellMiner	-0.421353	0.0451224	-	-
									;9-benzyl-7-benzyloxy-2-benzyl-1-methyl-9H-carbolinium b...	mRNA	CD93	Methylation	CellMiner	-0.42059	0.0172012	-0.429675	0.0480163
									antineoplastic-615538	mRNA	CD93	Methylation	CellMiner	-0.420585	0.0274899	-0.42751	0.0180261
									Imexon	mRNA	CD93	Methylation	CellMiner	-0.420118	0.0439882	-	-
									methyltrioctylammonium bis(trifluoromethylsulfonyl)imide	mRNA	CD93	Methylation	CellMiner	-0.420096	0.0387068	-	-
									benzamide, n-(2,3-dimethylphenyl)-2-hydroxy-3-nitro- (9ci)	mRNA	CD93	Methylation	CellMiner	-0.417692	0.030589	-	-
									1-methyl-3-octadecylimidazolium hexafluorophosphate	mRNA	CD93	Methylation	CellMiner	-0.41718	0.0367748	-	-
									1-hexadecyl-3-methylimidazolium chloride	mRNA	CD93	Methylation	CellMiner	-0.417139	0.0417187	-	-
									Isotretinoin	mRNA	CD93	Methylation	CellMiner	-0.415807	0.00937886	-	-
									baccharinol	mRNA	CD93	Methylation	CellMiner	-0.415021	0.0368701	-0.454307	0.0146023
									sudan red	mRNA	CD93	Methylation	CellMiner	-0.411513	0.0329257	-	-
									phyllanthoside	mRNA	CD93	Methylation	CellMiner	-0.405028	0.0474875	-0.447372	0.0223244
									piperidinium, 1,1-didodecyl-3-methyl-, bromide	mRNA	CD93	Methylation	CellMiner	-0.403409	0.0311787	-	-
									rhodium dimer	mRNA	CD93	Methylation	CellMiner	-0.402043	0.0236287	-0.3764	0.0308263
									Cetalkonium Chloride	mRNA	CD93	Methylation	CellMiner	-0.394041	0.0258575	-	-
									antineoplastic-131513	mRNA	CD93	Methylation	CellMiner	-0.384303	0.0205919	-0.356495	0.0224577
									phenanthridinium, 8-amino-5-methyl-6-phenyl-bromide	mRNA	CD93	Methylation	CellMiner	-0.377825	0.0445237	-0.372504	0.0359152
									triacetyl 13,14,15-isocrambescidin 800 hydrochloride	mRNA	CD93	Methylation	CellMiner	-0.373087	0.0379973	-	-
									cis-dichlorobis(4-methoxyphenethylamine)platinum(ii)	mRNA	CD93	Methylation	CellMiner	-0.369313	0.0373339	-0.364567	0.035044
									Basic Fuchsin	mRNA	CD93	Methylation	CellMiner	-0.327933	0.0465081	-0.364515	0.0234453
									10-(6'-ubiquinolyl)decyltriphenylphosphonium	mRNA	CD93	Methylation	CellMiner	-	-	-0.384693	0.0362004
									2-bromo-6-methyl-1,4,8-trimethoxynaphthalene	mRNA	CD93	Methylation	CellMiner	-	-	-0.418924	0.0489125
									25-dihydrosaframycin a	mRNA	CD93	Methylation	CellMiner	-	-	-0.515543	0.0037854
									2h-tetrazolium, 3-(2-biphenylyl)-2,5-diphenyl- chloride	mRNA	CD93	Methylation	CellMiner	-	-	-0.418567	0.0395715
									5,6-ethylenediquino[3,2-b	mRNA	CD93	Methylation	CellMiner	-	-	-0.381262	0.00973264
									b680433k349	mRNA	CD93	Methylation	CellMiner	-	-	-0.337043	0.0438328
									curromycin a.b mixture	mRNA	CD93	Methylation	CellMiner	-	-	-0.358349	0.0289754
									glaucarubinone	mRNA	CD93	Methylation	CellMiner	-	-	-0.452882	0.0240266
									herveline o	mRNA	CD93	Methylation	CellMiner	-	-	-0.346392	0.0460922
									indanthren corinth rk	mRNA	CD93	Methylation	CellMiner	-	-	-0.425938	0.0409417
									isothan	mRNA	CD93	Methylation	CellMiner	-	-	-0.552335	0.0173253
									mercury, (acetyloxy)(pentamethylphenyl)-	mRNA	CD93	Methylation	CellMiner	-	-	-0.45763	0.00692005
									methylbenzethonium chloride (usan)	mRNA	CD93	Methylation	CellMiner	-	-	-0.508748	0.0182023
									noac	mRNA	CD93	Methylation	CellMiner	-	-	-0.427937	0.0474555
									p-fuchsin	mRNA	CD93	Methylation	CellMiner	-	-	-0.350358	0.0208424
									saframycin ar1(ah2), methycarbinol deriv.-, stereoisomer	mRNA	CD93	Methylation	CellMiner	-	-	-0.442672	0.0230668
									sri 1215	mRNA	CD93	Methylation	CellMiner	-	-	0.295343	0.0440892
									stendomycin salicylate	mRNA	CD93	Methylation	CellMiner	-	-	-0.423482	0.0378094
									streptovaricin a	mRNA	CD93	Methylation	CellMiner	-	-	-0.412627	0.0416388
									trihexyl(tetradecyl)phosphonium hexafluorophosphate	mRNA	CD93	Methylation	CellMiner	-	-	-0.568574	0.0390771
									1-(3-chlorobenzyl)-1h-indole-3-carbaldehyde	mRNA	CD93	Mutation	CellMiner	-	-	-	-
									11-hydroxyusambarine chlorhydrate	mRNA	CD93	Mutation	CellMiner	-	-	-	-
									25-dihydrosaframycin a	mRNA	CD93	Mutation	CellMiner	-	-	-	-
									3-demethyl-3-butyrylthiocolchicine	mRNA	CD93	Mutation	CellMiner	-	-	-	-
									8-hydroxy verrucarin a	mRNA	CD93	Mutation	CellMiner	-	-	-	-
									;(5-(5'-(hydroxymethyl)-[2,2'-bifuran]-5-yl)thiophen-2-y...	mRNA	CD93	Mutation	CellMiner	-	-	-	-
									ailanthinone	mRNA	CD93	Mutation	CellMiner	-	-	-	-
									Aminoflavone	mRNA	CD93	Mutation	CellMiner	-	-	-	-
									chaparrinone, 6a-senecioyloxy	mRNA	CD93	Mutation	CellMiner	-	-	-	-
									diazonamide a	mRNA	CD93	Mutation	CellMiner	-	-	-	-
									glaucarubinone	mRNA	CD93	Mutation	CellMiner	-	-	-	-
									hemigossypolone	mRNA	CD93	Mutation	CellMiner	-	-	-	-
									miuraenamide a	mRNA	CD93	Mutation	CellMiner	-	-	-	-
									prodiginine hcl, butylcycloheptyl-	mRNA	CD93	Mutation	CellMiner	-	-	-	-
